# Supplementary material for: Direct Exposure to Outdoor Air Pollution Worsens the Functional Status of Stroke Patients Treated with Mechanical Thrombectomy
Source: MDPI journal article supplement (doi:10.3390/jcm13030746), 2024-01-27
Supplement: s1 [file s1]

Figure S1. Receiver operating characteristic (ROC) curve of the regression model analysis of the impact phenodata on a worsened functional status of patients ( $>2$  points on modified Rankin Scale) on the 10th day of stroke.

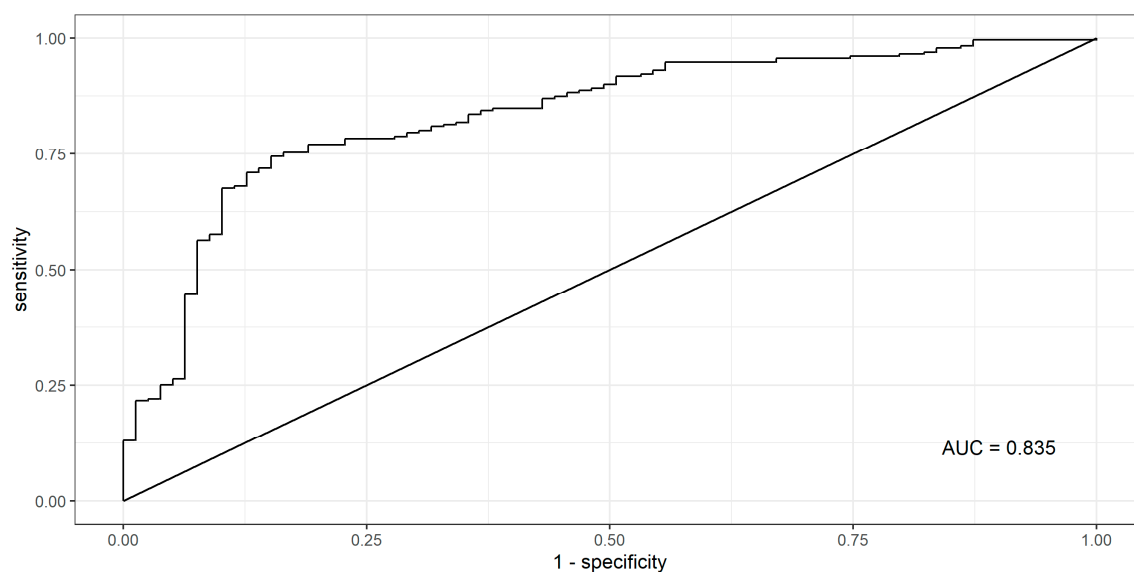

The curve was estimated in a “leave-one-out” procedure and the AUC estimator were used (AUC = 0.835)

Figure S2. Receiver operating characteristic (ROC) curve of the regression model analysis of the impact phenodata on a worsened functional status of patients ( $>2$  points on modified Rankin Scale) on the 90th day of stroke.

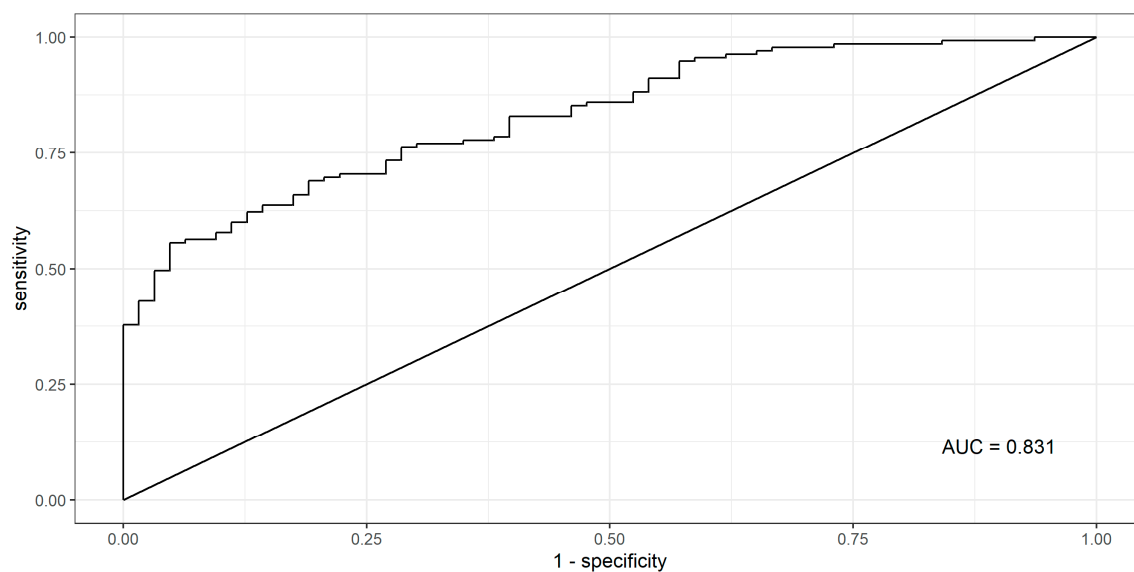

The curve was estimated in a “leave-one-out” procedure and the AUC estimator were used (AUC = 0.831)

Table S1. The concentration of air pollutants (SO<sub>2</sub>, NO<sub>2</sub>, CO, O<sub>3</sub>) collected in the period during all study period.

|                                | 2019 (01 JAN- 31 DEC)              |                                        |                                      |                                          | 2020 (01 JAN-31 DEC)               |                                        |                               |                                          | 2021 (01 JAN-31 DEC)               |                                     |                               |                                          | 2022 (01 JAN-30 JUN)               |                                     |                                      |                                            |
|--------------------------------|------------------------------------|----------------------------------------|--------------------------------------|------------------------------------------|------------------------------------|----------------------------------------|-------------------------------|------------------------------------------|------------------------------------|-------------------------------------|-------------------------------|------------------------------------------|------------------------------------|-------------------------------------|--------------------------------------|--------------------------------------------|
|                                | SO <sub>2</sub>                    | NO <sub>2</sub>                        | CO                                   | O <sub>3</sub>                           | SO <sub>2</sub>                    | NO <sub>2</sub>                        | CO                            | O <sub>3</sub>                           | SO <sub>2</sub>                    | NO <sub>2</sub>                     | CO                            | O <sub>3</sub>                           | SO <sub>2</sub>                    | NO <sub>2</sub>                     | CO                                   | O <sub>3</sub>                             |
| DAILY<br>med±SD, [ref.]        | 6.58±<br>4.58<br>[0-<br>23.16<br>] | 23.66<br>±6.47<br>[0-<br>55.72<br>]    | 0.44±<br>0.16<br>[0.18<br>-<br>1.25] | 45.44±<br>19.49<br>[3.73-<br>90.11<br>]  | 5.77±<br>5.01<br>[0-<br>20.11<br>] | 23.66<br>±6.47<br>[0-<br>51.02<br>]    | 0.18±<br>1.17<br>[0-<br>1.19] | 35.24±<br>19.49<br>[3.73-<br>90.11<br>]  | 6.78±<br>4.58<br>[0-<br>23.16<br>] | 19.23<br>±4.14<br>[0-<br>53.44<br>] | 0.25±<br>0.18<br>[0-<br>1.42] | 31.22±<br>9.31<br>[2.68-<br>93.47<br>]   | 5.48±<br>3.58<br>[0-<br>19.26<br>] | 19.23<br>±4.14<br>[0-<br>53.44<br>] | 0.09±<br>0.19<br>[0.72<br>-<br>1.44] | 27.47±<br>7.81<br>[3.72-<br>95.17<br>]     |
| MONT<br>HLY<br>med±SD, [ref.]  | 6.69±<br>4.48<br>[0-<br>26.63<br>] | 24.13<br>±7.18<br>[7.45-<br>53.55<br>] | 0.12±<br>0.21<br>[0-<br>1.16]        | 45.46±<br>19.81<br>[2.48-<br>103.11<br>] | 6.08±<br>4.22<br>[0-<br>20.55<br>] | 24.13<br>±7.18<br>[4.15-<br>53.55<br>] | 0.13±<br>1.19<br>[0-<br>1.51] | 45.46±<br>19.81<br>[2.48-<br>103.11<br>] | 7.69±<br>4.34<br>[0-<br>25.63<br>] | 21.19<br>±6.3<br>[0-<br>54.16<br>]  | 0.66±<br>0.31<br>[0-<br>1.43] | 40.16±<br>17.12<br>[1.98-<br>100.01<br>] | 6.01±<br>4.12<br>[0-<br>22.13<br>] | 21.19<br>±6.3<br>[0-<br>54.16<br>]  | 0.14±<br>0.42<br>[0.61<br>-<br>1.47] | 33.13±<br>14.22<br>[0.88-<br>96.97<br>]    |
| ANNU<br>ALLY<br>med±SD, [ref.] | 6.98±<br>4.29<br>[0-<br>26.98<br>] | 24.77<br>±9.88<br>[0-<br>56.15<br>]    | 0.1±0<br>.47<br>[0-<br>1.27]         | 47.13±<br>18.11<br>[2.12-<br>107.01<br>] | 6.98±<br>5.02<br>[0-<br>27.43<br>] | 25.16<br>±8.11<br>[0-<br>56.15<br>]    | 0.21±<br>1.48<br>[0-<br>1.88] | 47.13±<br>18.11<br>[2.12-<br>107.01<br>] | 6.98±<br>4.29<br>[0-<br>27.18<br>] | 24.77<br>±9.88<br>[0-<br>58.13<br>] | 0.11±<br>0.25<br>[0-<br>1.52] | 42.17±<br>16.77<br>[0-<br>103.74<br>]    | 6.18±<br>3.37<br>[0-<br>26.98<br>] | 24.77<br>±9.88<br>[0-<br>58.13<br>] | 1.14±<br>0.13<br>[0.02<br>-<br>1.51] | 29.27±<br>14.34<br>[0.81.9<br>9-<br>99.37] |

CO - carbon monoxide, NO<sub>2</sub> - nitrogen dioxide, O<sub>3</sub> - ozone, SO<sub>2</sub> - sulfur dioxide

Table S2. The concentration of air pollutants (PM 2.5, PM 10) collected in the period during all study period.

| Time range                        | 2019 (01 JAN- 31 DEC)        |                               | 2020 (01 JAN-31 DEC)         |                                | 2021 (01 JAN-31 DEC)          |                               | 2022 (01 JAN-30 JUN)         |                                |
|-----------------------------------|------------------------------|-------------------------------|------------------------------|--------------------------------|-------------------------------|-------------------------------|------------------------------|--------------------------------|
|                                   | PM2.5                        | PM10                          | PM2.5                        | PM10                           | PM2.5                         | PM10                          | PM2.5                        | PM10                           |
| DAILY,<br>med±SD,<br>[ref.]       | 20.81±13.6<br>8<br>[0-76.33] | 30.04±17.8<br>6<br>[0-98.79]  | 21.05±15.1<br>9<br>[0-81.24] | 28.04±15.82<br>[0-112.9]       | 19.89±15.5<br>8<br>[0-87.23]  | 30.50±19.8<br>8<br>[0-98.13]  | 22.88±14.6<br>6<br>[0-73.98] | 29.74±15.77<br>[0-87.14]       |
| MONTHLY<br>med±SD,<br>[ref.]      | 21.28±14.6<br>[0-78.23]      | 30.71±18.9<br>0<br>[0-105.25] | 20.35±12.8<br>3<br>[0-87.11] | 26.08±16.82<br>[0-119.77]      | 22.27±12.8<br>[0-93.23]       | 24.76±19.3<br>4<br>[0-112.99] | 24.24±16.6<br>[0-80.23]      | 31.11±17.53<br>[0-99.24]       |
| ANNUALL<br>Y<br>med±SD,<br>[ref.] | 20.71±13.6<br>9<br>[0-80.91] | 30.38±18.3<br>5<br>[0-123.22] | 21.87±13.0<br>1<br>[0-91.93] | 317.71±19.4<br>4<br>[0-126.12] | 21.28±12.3<br>6<br>[0-103.33] | 29.76±17.3<br>0<br>[0-136.92] | 24.11±18.1<br>4<br>[0-82.57] | 30.76±189.3<br>1<br>[0-105.23] |

PM - particulate matter (PM<sub>2.5</sub> - particles with aerodynamic diameter <2.5 µm; PM<sub>10</sub> - particles with aerodynamic diameter <10 µm)

Table S3. The correlation between the concentration of air pollutions and the functional outcomes at discharge, the 30th and the 90th day after stroke onset.

| contaminant | mRS>2<br>discharge         |         | mRS>2<br>30 <sup>th</sup> day |         | mRS>2<br>90 <sup>th</sup> day |         |
|-------------|----------------------------|---------|-------------------------------|---------|-------------------------------|---------|
|             | Correlation<br>coefficient | p.value | Correlation<br>coefficient    | p.value | Correlation<br>coefficient    | p.value |
| PM 2.5 0day | 0.91                       | 0.09    | 0.94                          | 0.06    | 0.84                          | 0.16    |
| PM 2.5 1day | 0.96                       | 0.04    | 0.94                          | 0.06    | 0.96                          | 0.04    |
| PM 2.5 3day | 0.77                       | 0.23    | 0.80                          | 0.20    | 0.85                          | 0.15    |
| PM 2.5 5day | 0.73                       | 0.27    | 1.00                          | <0.01   | 0.63                          | 0.37    |
| PM 2.5 8day | 0.32                       | 0.68    | 0.20                          | 0.80    | 0.18                          | 0.82    |
| PM 10 0day  | 0.84                       | 0.16    | 0.88                          | 0.12    | 0.80                          | 0.20    |
| PM 10 1day  | 0.84                       | 0.16    | 0.74                          | 0.26    | 0.84                          | 0.16    |
| PM 10 3day  | 0.42                       | 0.58    | 0.80                          | 0.20    | 0.95                          | 0.05    |
| PM 10 5day  | 0.89                       | 0.11    | 0.67                          | 0.33    | 0.38                          | 0.62    |
| PM 10 8day  | 0.71                       | 0.29    | 1.00                          | <0.01   | 0.71                          | 0.29    |
| NO2 0day    | 0.88                       | 0.12    | 0.72                          | 0.28    | 0.80                          | 0.20    |
| NO2 1day    | 0.89                       | 0.11    | 0.89                          | 0.11    | 0.91                          | 0.09    |
| NO2 3day    | 0.57                       | 0.43    | 0.42                          | 0.58    | 0.53                          | 0.47    |
| NO2 5day    | 0.63                       | 0.37    | 0.89                          | 0.11    | 0.55                          | 0.45    |
| NO2 8day    | 0.69                       | 0.34    | 0.45                          | 0.55    | 0.73                          | 0.27    |
| SO2 0day    | -0.14                      | 0.86    | -0.25                         | 0.75    | -0.12                         | 0.88    |
| SO2 1day    | 0.55                       | 0.45    | 0.77                          | 0.23    | 0.89                          | 0.11    |
| SO2 3day    | 0.00                       | 1.00    | 0.89                          | 0.11    | 0.63                          | 0.37    |
| SO2 5day    | 0.55                       | 0.45    | 0.30                          | 0.70    | 0.55                          | 0.45    |
| SO2 8day    | 0.77                       | 0.23    | 0.75                          | 0.25    | 0.63                          | 0.37    |
| CO 0day     | 0.86                       | 0.14    | 0.87                          | 0.13    | 0.84                          | 0.16    |
| CO 1day     | 0.91                       | 0.09    | 0.74                          | 0.26    | 0.63                          | 0.37    |
| CO 3day     | 0.85                       | 0.15    | 0.80                          | 0.20    | 0.55                          | 0.45    |
| CO 5day     | 0.63                       | 0.37    | 0.30                          | 0.70    | 0.18                          | 0.82    |
| CO 8day     | -0.91                      | 0.09    | -0.75                         | 0.25    | -0.73                         | 0.27    |
| O3 0day     | -0.60                      | 0.40    | -0.25                         | 0.75    | 0.00                          | 1.00    |
| O3 1day     | -0.45                      | 0.55    | 0.40                          | 0.60    | 0.60                          | 0.40    |
| O3 3day     | 0.95                       | 0.05    | 0.40                          | 0.60    | 0.18                          | 0.82    |
| O3 5day     | 0.00                       | 1.00    | 0.20                          | 0.80    | 0.32                          | 0.68    |
| O3 8day     | 0.60                       | 0.40    | 0.89                          | 0.11    | 0.84                          | 0.16    |
